# Supplementary material for: Shunting outcomes in communicating hydrocephalus: protocol for a multicentre, open-label, randomised controlled trial
Source: HighWire-hosted journal article supplement (doi:10.1136/bmjopen-2021-051127), 2021-08-01

**Supplementary Figure 1.** The selection of patients with probable idiopathic normal-pressure hydrocephalus. INPH, idiopathic normal-pressure hydrocephalus

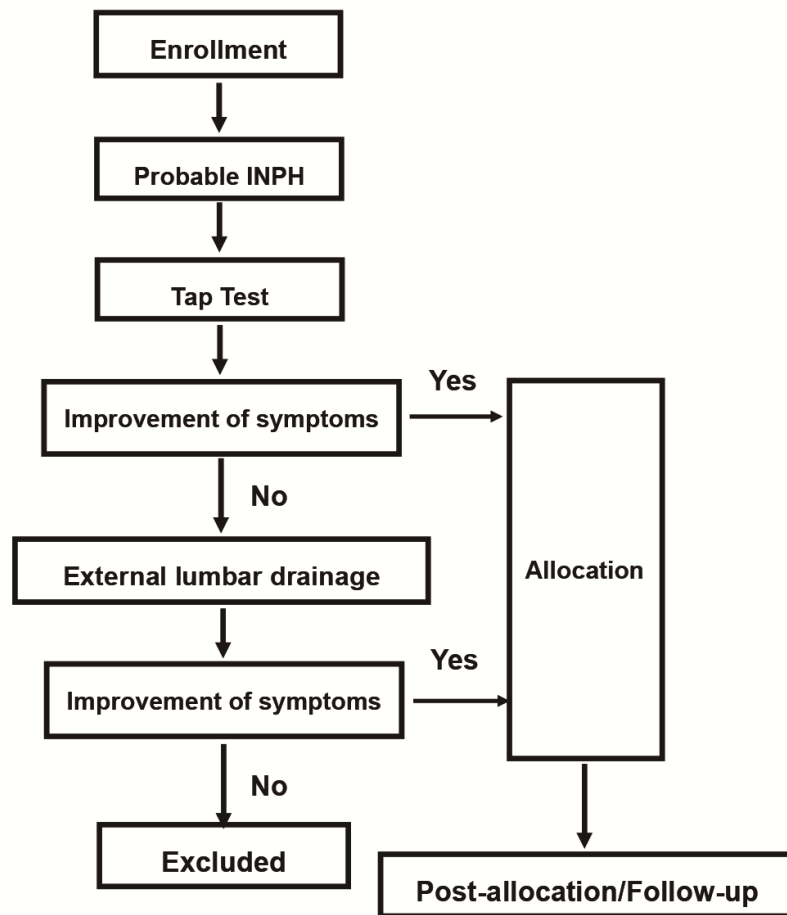

Supplement: bmjopen-2021-051127supp002_data_supplement.pdf [file bmjopen-2021-051127supp002_data_supplement.pdf]
